# Supplementary material
Source: PubMed Central journal article supplement (PMC5373478)
Supplement: NIHMS824572-supplement.pdf [file NIHMS824572-supplement.pdf]

**Appendix**  
**Changing Perceptions of Harm of E-Cigarettes Among U.S. Adults, 2012–2015**  
**Majeed et al.**

**Appendix Table 1.** Demographic Characteristics of the Samples

|                         | 2012         |      | 2014         |      | 2015         |      |
|-------------------------|--------------|------|--------------|------|--------------|------|
|                         | N (%)        | Wt % | N (%)        | Wt % | N (%)        | Wt % |
| <b>Sex</b>              |              |      |              |      |              |      |
| Male                    | 1,932 (46.3) | 48.2 | 2,807 (49.1) | 48.1 | 3,039 (50.2) | 48.6 |
| Female                  | 2,238 (53.7) | 51.8 | 2,910 (50.9) | 51.9 | 3,012 (49.8) | 51.4 |
| <b>Age</b>              |              |      |              |      |              |      |
| 18-24                   | 366 (8.8)    | 12.5 | 476 (8.3)    | 12.6 | 356 (5.9)    | 9.3  |
| 25-34                   | 488 (11.7)   | 17.5 | 816 (14.3)   | 16.3 | 1,116 (18.4) | 20.8 |
| 35-44                   | 740 (17.7)   | 16.8 | 940 (16.4)   | 18.1 | 917 (15.2)   | 16.2 |
| 45-54                   | 1,000 (24.0) | 18.9 | 1,054 (18.4) | 16.4 | 958 (15.8)   | 15.7 |
| 55-64                   | 750 (18.0)   | 16.4 | 1,250 (21.9) | 18.9 | 1,262 (20.9) | 19.5 |
| 65 +                    | 826 (19.8)   | 17.9 | 1,181 (20.7) | 17.7 | 1,442 (23.8) | 18.6 |
| <b>Race/Ethnicity</b>   |              |      |              |      |              |      |
| White, NH               | 3,094 (74.2) | 67.2 | 4,221 (73.8) | 66.0 | 4,462 (73.7) | 66.1 |
| Black, NH               | 406 (9.7)    | 11.3 | 566 (9.9)    | 11.6 | 519 (8.6)    | 11.2 |
| Other, NH               | 241 (5.8)    | 7.2  | 422 (7.4)    | 7.5  | 357 (5.9)    | 7.4  |
| Hispanic                | 429 (10.3)   | 14.3 | 508 (8.9)    | 14.9 | 713 (11.8)   | 15.2 |
| <b>Education</b>        |              |      |              |      |              |      |
| <HS                     | 263 (6.3)    | 12.6 | 442 (7.7)    | 12.6 | 372 (6.1)    | 11.2 |
| HS graduate             | 1,074 (25.8) | 30.1 | 1,690 (29.6) | 29.6 | 2,042 (33.7) | 30.1 |
| Some college            | 1,334 (32.0) | 28.8 | 1,735 (30.3) | 28.9 | 1,591 (26.3) | 28.9 |
| College +               | 1,499 (35.9) | 28.5 | 1,850 (32.4) | 28.9 | 2,046 (33.8) | 29.8 |
| <b>Household Income</b> |              |      |              |      |              |      |
| <\$15K                  | 337 (8.1)    | 9.5  | 609 (10.7)   | 11.4 | 717 (11.8)   | 11.8 |
| \$15K - \$24,9K         | 338 (8.1)    | 9.5  | 453 (7.9)    | 7.1  | 509 (8.4)    | 6.2  |
| \$25K - \$39,9K         | 602 (14.4)   | 14.5 | 855 (15.0)   | 15.5 | 973 (16.1)   | 14.8 |
| \$40K - \$59,9K         | 722 (17.3)   | 16.9 | 976 (17.1)   | 16.2 | 1,051 (17.4) | 15.7 |
| \$60K - \$84,9K         | 816 (19.6)   | 19.7 | 963 (16.8)   | 16.7 | 1,091 (18.0) | 19.1 |
| \$85K - \$99,9K         | 338 (8.1)    | 8.3  | 365 (6.4)    | 6.8  | 425 (7.0)    | 9.0  |
| \$100K +                | 1,017 (24.4) | 21.6 | 1,496 (26.2) | 26.4 | 1,285 (21.2) | 23.4 |
| <b>Region</b>           |              |      |              |      |              |      |
| Northeast               | 775 (18.6)   | 18.1 | 1,019 (17.8) | 18.2 | 1,058 (17.5) | 18.2 |
| Midwest                 | 1,041 (25)   | 21.6 | 1,383 (24.2) | 21.4 | 1,592 (26.3) | 21.7 |
| South                   | 1,432 (34.3) | 37.2 | 2,067 (36.2) | 37.1 | 2,010 (33.2) | 36.8 |
| West                    | 922 (22.1)   | 23.1 | 1,248 (21.8) | 23.4 | 1,391 (23.0) | 23.3 |

N, unweighted frequency; Wt %, Weighted %; NH, Non-Hispanic; HS, high school

**Appendix**  
**Changing Perceptions of Harm of E-Cigarettes Among U.S. Adults, 2012–2015**  
**Majeed et al.**

**Appendix Table 2.** Perceived Addictiveness of E-Cigarettes by Participant Characteristics Among U.S. Adults: 2015

|                                       | Responses                   |                            |                              |
|---------------------------------------|-----------------------------|----------------------------|------------------------------|
|                                       | Yes<br>% (95% CI)           | No<br>% (95% CI)           | “I don’t know”<br>% (95% CI) |
| <b>Characteristics</b>                |                             |                            |                              |
| <b>Sex</b>                            |                             |                            |                              |
| Male                                  | 67.7<br>(65.4, 69.9)        | 4.0<br>(3.1, 5.1)          | 28.3<br>(26.3, 30.5)         |
| Female                                | 67.6<br>(65.3, 69.8)        | 3.5<br>(2.7, 4.6)          | 28.9<br>(26.8, 31.2)         |
| <b>Age (years)<sup>***</sup></b>      |                             |                            |                              |
| 18-24                                 | <b>71.4</b><br>(65.3, 76.8) | 4.2<br>(2.4, 7.2)          | <b>24.5</b><br>(19.4, 30.4)  |
| 25-34                                 | <b>70.1</b><br>(66.4, 73.6) | 7.2<br>(5.3, 9.7)          | <b>22.7</b><br>(19.6, 26.2)  |
| 35-44                                 | <b>71.6</b><br>(67.5, 75.3) | 3.9<br>(2.4, 6.3)          | <b>24.5</b><br>(21.0, 28.4)  |
| 45-54                                 | <b>71.4</b><br>(67.5, 75.0) | 2.5<br>(1.7, 3.8)          | <b>26.1</b><br>(22.6, 30.0)  |
| 55-64                                 | <b>63.0</b><br>(59.3, 66.6) | 2.4<br>(1.4, 4.1)          | <b>34.6</b><br>(31.0, 38.3)  |
| 65+                                   | <b>60.9</b><br>(57.4, 64.3) | 1.9<br>(1.2, 3.1)          | <b>37.2</b><br>(33.8, 40.7)  |
| <b>Race/Ethnicity<sup>***</sup></b>   |                             |                            |                              |
| White, NH                             | <b>69.6</b><br>(67.8, 71.3) | 2.5<br>(2.0, 3.1)          | 27.9<br>(26.2, 29.7)         |
| Black, NH                             | <b>53.3</b><br>(47.5, 59.1) | 6.7<br>(4.0, 10.9)         | 40.0<br>(34.4, 45.8)         |
| Other, NH                             | <b>70.0</b><br>(62.6, 76.5) | 2.8<br>(1.3, 5.9)          | 27.2<br>(20.9, 34.5)         |
| Hispanic                              | <b>67.5</b><br>(62.9, 71.9) | 8.0<br>(5.5, 11.3)         | 24.5<br>(20.7, 28.8)         |
| <b>Education<sup>***</sup></b>        |                             |                            |                              |
| <High school                          | <b>62.7</b><br>(56.0, 68.9) | <b>5.5</b><br>(3.1, 9.6)   | 31.8<br>(26.0, 38.3)         |
| High school                           | <b>62.6</b><br>(59.7, 65.4) | <b>4.9</b><br>(3.7, 6.6)   | <b>32.5</b><br>(29.8, 35.3)  |
| Some college                          | 68.9<br>(65.8, 71.8)        | <b>4.2</b><br>(3.0, 5.7)   | 27.0<br>(24.2, 29.9)         |
| College degree +                      | <b>72.8</b><br>(70.3, 75.3) | <b>1.7</b><br>(1.1, 2.4)   | <b>25.5</b><br>(23.1, 28.1)  |
| <b>Household income<sup>***</sup></b> |                             |                            |                              |
| <\$15K                                | <b>54.2</b><br>(48.4, 59.9) | <b>10.0</b><br>(6.9, 14.3) | <b>35.8</b><br>(30.5, 41.5)  |
| \$15K–\$24.9K                         | 62.6                        | 5.2                        | 32.2                         |

**Appendix**  
**Changing Perceptions of Harm of E-Cigarettes Among U.S. Adults, 2012–2015**  
**Majeed et al.**

|                    |                     |                    |                     |
|--------------------|---------------------|--------------------|---------------------|
|                    | (55.8, 68.9)        | (2.7, 9.8)         | (26.3, 38.8)        |
| \$25K–\$39.9K      | <b>67.0</b>         | <b>4.2</b>         | 28.8                |
|                    | <b>(62.6, 71.1)</b> | <b>(2.8, 6.3)</b>  | (24.8, 33.1)        |
| \$40K–\$59.9K      | 64.9                | <b>2.9</b>         | 32.2                |
|                    | (60.8, 68.7)        | <b>(2.0, 4.4)</b>  | (28.5, 36.2)        |
| ≥\$60K             | <b>71.8</b>         | <b>2.5</b>         | <b>25.7</b>         |
|                    | <b>(69.6, 73.8)</b> | <b>(1.8, 3.5)</b>  | <b>(23.8, 27.8)</b> |
| U.S. region*       |                     |                    |                     |
| Northeast          | 65.4                | 3.9                | 30.7                |
|                    | (61.3, 69.2)        | (2.7, 5.5)         | (27.0, 34.8)        |
| Midwest            | 65.6                | 3.3                | <b>31.1</b>         |
|                    | (62.4, 68.7)        | (2.2, 4.9)         | <b>(28.2, 34.2)</b> |
| South              | 67.2                | 3.6                | 29.2                |
|                    | (64.4, 69.8)        | (2.6, 5.0)         | (26.7, 31.9)        |
| West               | 72.0                | 4.3                | <b>23.7</b>         |
|                    | (68.7, 75.0)        | (3.0, 6.1)         | <b>(20.9, 26.9)</b> |
| E-cigarette use*** |                     |                    |                     |
| Ever tried         | 65.8                | <b>8.9</b>         | 25.3                |
|                    | (62.1, 69.4)        | <b>(7.0, 11.2)</b> | (22.1, 28.8)        |
| Never tried        | 68.1                | <b>2.5</b>         | 29.4                |
|                    | (66.3, 69.8)        | <b>(1.9, 3.3)</b>  | (27.7, 31.2)        |

Note: Boldface indicates statistical significance (\* $p < 0.05$ ; \*\* $p < 0.01$ ; \*\*\* $p < 0.001$ ).  $p$  is based on weighted bivariate tests of association ( $\chi^2$ ).

NH, non-Hispanic
